# Supplementary material
Source: Springer Nature journal article supplement (https://www.springermedizin.de/resource/supplementary/12943_2010_725_MOESM3_ESM.pdf/9554680)

**A**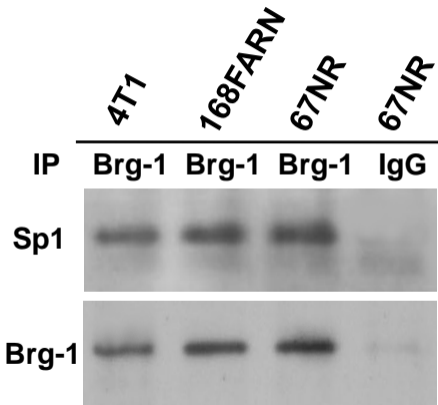**B**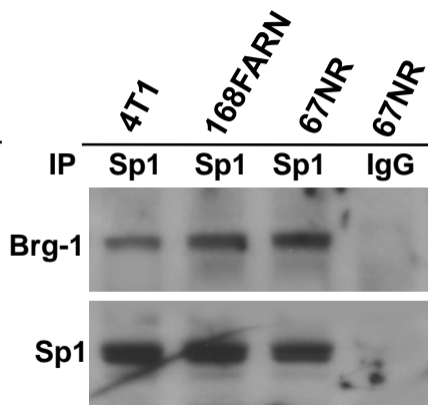**C**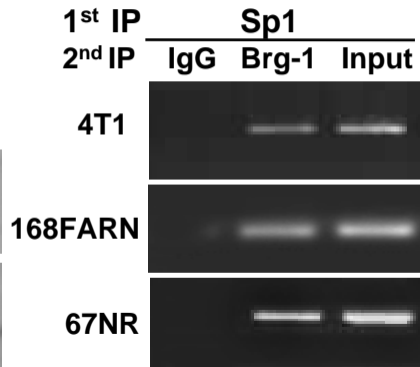

Supplement: MOESM3 [file 9554680]
